# Supplementary material for: An epithelial signalling centre in sharks supports homology of tooth morphogenesis in vertebrates
Source: eLife. 2022 May 10;11:e73173. doi: 10.7554/eLife.73173 (PMC9249395; doi:10.7554/eLife.73173)
Supplement: Figure 6—source data 5. [file elife-73173-fig6-data5.csv]

Sample	Treatment	Tooth position
DMSO_1	DMSO	L1
DMSO_1	DMSO	L2
DMSO_1	DMSO	L3
DMSO_1	DMSO	R1
DMSO_1	DMSO	R2
DMSO_1	DMSO	R3
DMSO_3	DMSO	L1
DMSO_3	DMSO	L2
DMSO_3	DMSO	L3
DMSO_3	DMSO	R1
DMSO_3	DMSO	R2
DMSO_3	DMSO	R3
DMSO_4	DMSO	L1
DMSO_4	DMSO	L2
DMSO_4	DMSO	L3
DMSO_4	DMSO	R1
DMSO_4	DMSO	R2
DMSO_4	DMSO	R3
DMSO_5	DMSO	L1
DMSO_5	DMSO	L2
DMSO_5	DMSO	L3
DMSO_5	DMSO	R1
DMSO_5	DMSO	R2
DMSO_5	DMSO	R3
DMSO_6	DMSO	L1
DMSO_6	DMSO	L2
DMSO_6	DMSO	L3
DMSO_6	DMSO	R1
DMSO_6	DMSO	R2
DMSO_6	DMSO	R3
DMSO_7	DMSO	L1
DMSO_7	DMSO	L2
DMSO_7	DMSO	L3
DMSO_7	DMSO	R1
DMSO_7	DMSO	R2
DMSO_7	DMSO	R3
DMSO_8	DMSO	L1
DMSO_8	DMSO	L2
DMSO_8	DMSO	L3
DMSO_8	DMSO	R1
DMSO_8	DMSO	R2
DMSO_8	DMSO	R3
endo_1	IWR-1-endo	L1
endo_1	IWR-1-endo	L2
endo_1	IWR-1-endo	L3
endo_1	IWR-1-endo	R1
endo_1	IWR-1-endo	R2
endo_1	IWR-1-endo	R3
endo_2	IWR-1-endo	L1
endo_2	IWR-1-endo	L2
endo_2	IWR-1-endo	L3
endo_2	IWR-1-endo	R1
endo_2	IWR-1-endo	R2
endo_2	IWR-1-endo	R3
endo_3	IWR-1-endo	L1
endo_3	IWR-1-endo	L2
endo_3	IWR-1-endo	L3
endo_3	IWR-1-endo	R1
endo_3	IWR-1-endo	R2
endo_3	IWR-1-endo	R3
endo_4	IWR-1-endo	L1
endo_4	IWR-1-endo	L2
endo_4	IWR-1-endo	L3
endo_4	IWR-1-endo	R1
endo_4	IWR-1-endo	R2
endo_4	IWR-1-endo	R3
endo_5	IWR-1-endo	L1
endo_5	IWR-1-endo	L2
endo_5	IWR-1-endo	L3
endo_5	IWR-1-endo	R1
endo_5	IWR-1-endo	R2
endo_5	IWR-1-endo	R3
endo_6	IWR-1-endo	L1
endo_6	IWR-1-endo	L2
endo_6	IWR-1-endo	L3
endo_6	IWR-1-endo	R1
endo_6	IWR-1-endo	R2
endo_6	IWR-1-endo	R3
endo_7	IWR-1-endo	L1
endo_7	IWR-1-endo	L2
endo_7	IWR-1-endo	L3
endo_7	IWR-1-endo	R1
endo_7	IWR-1-endo	R2
endo_7	IWR-1-endo	R3
endo_8	IWR-1-endo	L1
endo_8	IWR-1-endo	L2
endo_8	IWR-1-endo	L3
endo_8	IWR-1-endo	R1
endo_8	IWR-1-endo	R2
endo_8	IWR-1-endo	R3
chir_1	CHIR-99021	L1
chir_1	CHIR-99021	L2
chir_1	CHIR-99021	L3
chir_1	CHIR-99021	R1
chir_1	CHIR-99021	R2
chir_1	CHIR-99021	R3
chir_2	CHIR-99021	L1
chir_2	CHIR-99021	L2
chir_2	CHIR-99021	L3
chir_2	CHIR-99021	R1
chir_2	CHIR-99021	R2
chir_2	CHIR-99021	R3
chir_3	CHIR-99021	L1
chir_3	CHIR-99021	L2
chir_3	CHIR-99021	L3
chir_3	CHIR-99021	R1
chir_3	CHIR-99021	R2
chir_3	CHIR-99021	R3
chir_4	CHIR-99021	L1
chir_4	CHIR-99021	L2
chir_4	CHIR-99021	L3
chir_4	CHIR-99021	R1
chir_4	CHIR-99021	R2
chir_4	CHIR-99021	R3
chir_5	CHIR-99021	L1
chir_5	CHIR-99021	L2
chir_5	CHIR-99021	L3
chir_5	CHIR-99021	R1
chir_5	CHIR-99021	R2
chir_5	CHIR-99021	R3
chir_6	CHIR-99021	L1
chir_6	CHIR-99021	L2
chir_6	CHIR-99021	L3
chir_6	CHIR-99021	R1
chir_6	CHIR-99021	R2
chir_6	CHIR-99021	R3
chir_7	CHIR-99021	L1
chir_7	CHIR-99021	L2
chir_7	CHIR-99021	L3
chir_7	CHIR-99021	R1
chir_7	CHIR-99021	R2
chir_7	CHIR-99021	R3
chir_8	CHIR-99021	L1
chir_8	CHIR-99021	L2
chir_8	CHIR-99021	L3
chir_8	CHIR-99021	R1
chir_8	CHIR-99021	R2
chir_8	CHIR-99021	R3
