# Supplementary material for: An epithelial signalling centre in sharks supports homology of tooth morphogenesis in vertebrates
Source: eLife. 2022 May 10;11:e73173. doi: 10.7554/eLife.73173 (PMC9249395; doi:10.7554/eLife.73173)
Supplement: Figure 6—source data 6. [file elife-73173-fig6-data6.csv]

before	slide	after
1	3	4
3	4	5
4	5	6
5	6	7
6	7	8
7	8	9
8	9	10
9	10	11
10	11	12
11	12	13
12	13	14
13	14	15
14	15	16
15	16	17
16	17	18
17	18	19
18	19	20
19	20	2
1	21	22
21	22	23
22	23	24
23	24	25
24	25	26
25	26	27
26	27	28
27	28	29
28	29	30
29	30	31
30	31	32
31	32	33
32	33	34
33	34	35
34	35	36
35	36	37
36	37	38
37	38	2
